# Supplementary material for: Effect of insect exclusion screens on insect pests in high tunnels
Source: Research Square preprint supplement (doi:10.21203/rs.3.rs-7614865/v1), 2025-10-30
Supplement: Supplementary file 1 [file 11a55c4ab123370a84f282fb.docx]

**Supporting information**

Table S1. Complete results of the statistical analysis. Fixed effects of insect exclusion screens on temperatures and abundance of insect pests using repeated measures ANOVA with PROC GLIMMIX in SAS.

| **Factors** | **df** | | ***F value*** | ***P value*** |  |
| --- | --- | --- | --- | --- | --- |
| 1. Temperature (2023) | | | | | |
| Treatment | 1 | 78 | 0.00 | 0.993 |  |
| Sampling date | 1 | 9 | 10.52 | 0.010 | ** |
| 1. Temperature (2024) | | | | | |
| Treatment | 1 | 57 | 0.03 | 0.865 |  |
| Sampling date | 1 | 9 | 13.00 | 0.006 | ** |
| 1. Small pests (2023) | | | | | |
| Treatment | 1 | 222 | 6.12 | 0.014 | ** |
| Sampling date | 1 | 24 | 19.14 | < 0.001 | ** |
| Sampling date *****Treatment | 1 | 222 | 8.24 | 0.005 | ** |
| Sampling method | 2 | 222 | 17.79 | < 0.001 | ** |
| Treatment *****sampling method | 2 | 222 | 1.38 | 0.253 |  |
| Sampling date *****sampling method | 2 | 24 | 4.20 | 0.027 | ** |
| Sampling date *treatment*sampling method | 2 | 222 | 0.79 | 0.454 |  |
| 1. Aphididae (aphids, 2023) | | | | | |
| Treatment | 1 | 222 | 8.96 | 0.003 | ** |
| Sampling date | 1 | 24 | 16.79 | < 0.001 | ** |
| Sampling date *Treatment | 1 | 222 | 13.85 | < 0.001 | ** |
| Sampling method | 2 | 222 | 35.23 | < 0.001 | ** |
| Treatment *sampling method | 2 | 222 | 0.48 | 0.619 |  |
| Sampling date *sampling method | 2 | 24 | 4.77 | 0.018 | ** |
| Sampling date *treatment*sampling method | 2 | 222 | 0.44 | 0.646 |  |
| 1. Thysanoptera (thrips, 2023) | | | | | |
| Treatment | 1 | 144 | 4.08 | 0.045 | ** |
| Sampling date | 1 | 16 | 10.42 | 0.005 | ** |
| Sampling date *Treatment | 1 | 144 | 0.02 | 0.883 |  |
| Sampling method | 1 | 144 | 23.57 | < 0.001 | ** |
| Treatment *sampling method | 1 | 144 | 0.04 | 0.833 |  |
| Sampling date *sampling method | 1 | 16 | 0.00 | 0.967 |  |
| Sampling date *treatment*sampling method | 1 | 144 | 0.51 | 0.475 |  |
| 1. Small pests (2024) |  |  |  |  |  |
| Treatment | 1 | 228 | 1.16 | 0.282 |  |
| Sampling date | 1 | 24 | 22.74 | < 0.001 | ** |
| Sampling date *Treatment | 1 | 228 | 0.12 | 0.725 |  |
| Sampling method | 2 | 228 | 3.56 | 0.030 | ** |
| Treatment *sampling method | 2 | 228 | 4.84 | 0.009 | ** |
| Sampling date *sampling method | 2 | 24 | 7.16 | 0.004 | ** |
| Sampling date *treatment*sampling method | 2 | 228 | 0.26 | 0.775 |  |
| 1. Small pests (vacuum data only, 2024) |  |  |  |  |  |
| Treatment | 1 | 78 | 4.22 | 0.043 | ** |
| Sampling date | 1 | 9 | 5.60 | 0.042 | ** |
| 1. Small pests (visual observation data only, 2024) | | | | | |
| Treatment | 1 | 78 | 24.49 | < 0.001 | ** |
| Sampling date | 1 | 9 | 41.14 | < 0.001 | ** |
| 1. Small pests (sticky trap data only, 2024) | | | | | |
| Treatment | 1 | 141 | 10.90 | 0.001 | ** |
| Sampling date | 1 | 9 | 0.16 | 0.700 |  |
| 1. Aphididae (aphids, 2024) | | | | | |
| Treatment | 1 | 228 | 7.94 | 0.005 | ** |
| Sampling date | 1 | 24 | 11.66 | 0.002 | ** |
| Sampling date *Treatment | 1 | 228 | 0.13 | 0.720 |  |
| Sampling method | 2 | 228 | 20.84 | < 0.001 | ** |
| Treatment *sampling method | 2 | 228 | 0.48 | 0.620 |  |
| Sampling date *sampling method | 2 | 24 | 6.72 | 0.005 | ** |
| Sampling date *treatment*sampling method | 2 | 228 | 0.14 | 0.872 |  |
| 1. Thysanoptera (thrips, 2024) | | | | | |
| Treatment | 1 | 228 | 1.23 | 0.269 |  |
| Sampling date | 1 | 24 | 0.61 | 0.443 |  |
| Sampling date *Treatment | 1 | 228 | 0.07 | 0.786 |  |
| Sampling method | 2 | 228 | 20.93 | < 0.001 | ** |
| Treatment *sampling method | 2 | 228 | 1.17 | 0.314 |  |
| Sampling date *sampling method | 2 | 24 | 0.56 | 0.581 |  |
| Sampling date *treatment*sampling method | 2 | 228 | 0.09 | 0.913 |  |
| 1. Thysanoptera (thrips, sticky trap data only, 2024) | | | | | |
| Treatment | 1 | 64 | 5.11 | 0.027 |  |
| Sampling date | 1 | 8 | 2.97 | 0.123 |  |
| 1. Medium pests (2023) | | | | | |
| Treatment | 1 | 222 | 13.41 | < 0.001 | ** |
| Sampling date | 1 | 24 | 2.19 | 0.152 |  |
| Sampling date *Treatment | 1 | 222 | 1.36 | 0.245 |  |
| Sampling method | 2 | 222 | 37.01 | < 0.001 | ** |
| Treatment *sampling method | 2 | 222 | 0.42 | 0.656 |  |
| Sampling date *sampling method | 2 | 24 | 11.82 | < 0.001 | ** |
| Sampling date *treatment*sampling method | 2 | 222 | 0.38 | 0.682 |  |
| 1. Alticinae (flea beetles, 2023) | | | | | |
| Treatment | 1 | 222 | 7.36 | 0.007 | ** |
| Sampling date | 1 | 24 | 0.57 | 0.457 |  |
| Sampling date *Treatment | 1 | 222 | 2.92 | 0.089 |  |
| Sampling method | 2 | 222 | 0.66 | 0.520 | ** |
| Treatment *sampling method | 2 | 222 | 0.32 | 0.728 |  |
| Sampling date *sampling method | 2 | 24 | 3.13 | 0.062 |  |
| Sampling date *treatment*sampling method | 2 | 222 | 0.62 | 0.541 |  |
| 1. Cicadellidae (leafhoppers, 2023) |  |  |  |  |  |
| Treatment | 1 | 222 | 0.57 | 0.451 |  |
| Sampling date | 1 | 29 | 0.00 | 0.972 |  |
| Sampling method | 2 | 222 | 1.82 | 0.165 |  |
| Treatment *sampling method | 2 | 222 | 0.28 | 0.752 |  |
| 1. Medium pests (2024) | | | | | |
| Treatment | 1 | 227 | 10.02 | 0.002 | ** |
| Sampling date | 1 | 24 | 0.18 | 0.674 |  |
| Sampling date *Treatment | 1 | 227 | 0.43 | 0.515 |  |
| Sampling method | 2 | 227 | 15.76 | < 0.001 | ** |
| Treatment *sampling method | 2 | 227 | 1.67 | 0.191 |  |
| Sampling date *sampling method | 2 | 24 | 1.09 | 0.354 |  |
| Sampling date *treatment*sampling method | 2 | 227 | 1.68 | 0.189 |  |
| 1. Alticinae (flea beetles, 2024) | | | | | |
| Treatment | 1 | 228 | 0.29 | 0.593 |  |
| Sampling date | 1 | 24 | 0.14 | 0.712 |  |
| Sampling date *Treatment | 1 | 228 | 0.17 | 0.678 |  |
| Sampling method | 2 | 228 | 6.01 | 0.003 | ** |
| Treatment *sampling method | 2 | 228 | 0.09 | 0.910 |  |
| Sampling date *sampling method | 2 | 24 | 1.01 | 0.378 |  |
| Sampling date *treatment*sampling method | 2 | 228 | 0.47 | 0.626 |  |
| 1. Cicadellidae (leafhoppers, 2024) | | | | | |
| Treatment | 1 | 228 | 0.76 | 0.383 |  |
| Sampling date | 1 | 29 | 0.00 | 0.999 |  |
| Sampling method | 2 | 228 | 2.35 | 0.098 |  |
| Treatment *sampling method | 2 | 228 | 0.37 | 0.694 |  |
| 1. Large pests (2023) | | | | | |
| Treatment | 1 | 222 | 1.01 | 0.317 |  |
| Sampling date | 1 | 24 | 0.22 | 0.640 |  |
| Sampling date *Treatment | 1 | 222 | 0.94 | 0.334 |  |
| Sampling method | 2 | 222 | 0.63 | 0.532 |  |
| Treatment *sampling method | 2 | 222 | 0.81 | 0.445 |  |
| Sampling date *sampling method | 2 | 24 | 0.14 | 0.867 |  |
| Sampling date *treatment*sampling method | 2 | 222 | 0.84 | 0.435 |  |
| 1. Large pests (2024) | | | | | |
| Treatment | 1 | 228 | 2.27 | 0.134 |  |
| Sampling date | 1 | 24 | 3.30 | 0.082 |  |
| Sampling date *Treatment | 1 | 228 | 0.20 | 0.657 |  |
| Sampling method | 2 | 228 | 5.24 | 0.006 |  |
| Treatment *sampling method | 2 | 228 | 0.47 | 0.625 |  |
| Sampling date *sampling method | 2 | 24 | 0.15 | 0.863 |  |
| Sampling date *treatment*sampling method | 2 | 228 | 0.74 | 0.476 |  |

Figure S1. Effect of exclusion screens on arthropod pests of tomatoes inside commercial high tunnels in 2023. The abundance of insects was estimated using three sampling methods (vacuum, sticky trap, visual observation) over ten sampling dates. Mean (+/- SE) of all sampling methods and treatments over time on A) small pests, B) aphids, C) thrips, D) medium pests, E) flea beetles, and F) large pests.

Figure S2. Effect of exclusion screens on arthropod pests of tomatoes inside commercial high tunnels in 2024. The abundance of insects was estimated using three sampling methods (vacuum, sticky trap, visual observation) over ten sampling dates. Mean (+/- SE) of all sampling methods and treatments over time on A) small pests, B) aphids, C) thrips, D) medium pests, E) flea beetles, and F) large pests.
